# Supplementary material for: The Impact of Comorbid Renal Dysfunction in Patients with Hepatocellular Carcinoma on Long-Term Outcomes after Curative Resection
Source: Research Square preprint supplement (doi:10.21203/rs.3.rs-864581/v1), 2021-09-09
Supplement: Supplementary file 1 [file 53bfa7af2e130c12e7282fff.docx]

**Supplemental Table 1**

|  |  | pre propensity score matching | | | | | | | post propensity score matching | | | | | | |
| --- | --- | --- | --- | --- | --- | --- | --- | --- | --- | --- | --- | --- | --- | --- | --- |
|  |  | RD  (eGFR<60) | | | non-RD  (60≤eGFR) | | | *P*-value | RD  (eGFR<60) | | | non-RD  (60≤eGFR) | | | *P*-value |
|  |  | n=128 | | | n=672 | | | n=110 | | | n=110 | | |
| **Age (yeas)** | | 69.5 | ± | 8.6 | 63.0 | ± | 10.4 | **<0.0001** | 69.5 | ± | 0.9 | 69.8 | ± | 0.9 | 0.6455 |
| Etiology | |  |  |  |  |  |  |  |  |  |  |  |  |  |  |
|  | **HBV**, n (%) | 29 (22.7) | | | 263 (39.1) | | | **0.0004** | 24 (10.9) | | | 23 (10.5) | | | 0.8693 |
|  | **NBNC**, n (%) | 58 (45.3) | | | 191 (28.5) | | | **0.0002** | 52 (47.3) | | | 48 (43.6) | | | 0.4740 |
| Laboratory data | |  |  |  |  |  |  |  |  |  |  |  |  |  |  |
|  | **T-bil (mg/dL)** | 0.7 | ± | 0.3 | 0.8 | ± | 0.4 | **0.0008** | 0.7 | ± | 0.0 | 0.7 | ± | 0.0 | 0.6584 |
|  | **AST (IU/L)** | 35.5 | ± | 31.2 | 43.0 | ± | 43.4 | **0.0112** | 46.3 | ± | 3.0 | 46.8 | ± | 3.0 | 0.9174 |
|  | **ALT (IU/L)** | 31.5 | ± | 30.0 | 40.0 | ± | 36.1 | **0.0037** | 41.7 | ± | 2.8 | 40.8 | ± | 2.8 | 0.8262 |
|  | **HbA1c (%)** | 5.7 | ± | 1.1 | 5.3 | ± | 1.1 | **0.0105** | 5.8 | ± | 0.1 | 5.9 | ± | 0.1 | 0.8841 |

*P* values were determined by the chi-square test or the Mann-Whitney *U*-test. The bold values represent significant differences (*P*-value <0.05). RD, renal dysfunction; HBV, hepatitis B virus; HCV, hepatitis C virus; NBNC, non-HBV or HCV; T-bil, total bilirubin; AST, aspartate aminotransferase; ALT, alanine aminotransferase; HbA1c, hemoglobin A1c.
